# Supplementary material
Source: MDPI journal article supplement (https://www.mdpi.com/2571-841X/3/4/35)
Supplement: s1 [file s1]

**Healthy Start**  
**Child Development: Parent Perspectives**

1. Are you the parent or guardian of a child here for a visit today?

☐ NO (**please stop survey and turn it in**)  
☐ YES (**please continue**)

***Please complete the following questions about your child that just attended the health supervision visit***

2. Is your child a boy or girl?

☐ Boy ☐ Girl

3. How old is your child:

☐ 6-11 months  
☐ 12-17 months  
☐ 18-23 months  
☐ 2 years

4. What health insurance does your child have?

☐ Medicaid or KidCare  
☐ Insurance (other than Medicaid or Public Insurance)  
☐ Self-Pay (no insurance)  
☐ Other (specify \_\_\_\_\_)

5. Child's race/ethnicity:

☐ Asian/ Pacific Islander  
☐ Black/African-American  
☐ Hispanic  
☐ White/Caucasian  
☐ Other (describe \_\_\_\_\_)

6. I feel my child is...

☐ underweight  
☐ a little underweight  
☐ about the right weight  
☐ a little overweight  
☐ overweight

7. Are you aware OR have you ever been told by any medical provider that your child has any conditions that affects how he/she is growing

☐ No

☐ Yes, please explain: \_\_\_\_\_

☐ Not sure, Please explain: \_\_\_\_\_

|                                               |
|-----------------------------------------------|
| <b>The following questions are about you.</b> |
|-----------------------------------------------|

8. What is the highest grade that you completed?

- ☐ Did not finish high school
- ☐ High school graduate or GED
- ☐ Some college or trade school
- ☐ College graduate
- ☐ Post-graduate degree

9. I feel I am .....

- ☐ underweight
- ☐ a little underweight
- ☐ about the right weight
- ☐ a little overweight
- ☐ overweight

10. Are you single (never married, divorced, widowed or separated) or married?

- ☐ Single
- ☐ Married or living with partner

11. Using a scale from 1 to 10, where 1 means 'no stress' and 10 means 'an extreme amount of stress', what is your stress level today?

|           |   |   |   |   |   |   |   |   |                |
|-----------|---|---|---|---|---|---|---|---|----------------|
| 1         | 2 | 3 | 4 | 5 | 6 | 7 | 8 | 9 | 10             |
| No stress |   |   |   |   |   |   |   |   | Extreme stress |

12. Using a scale from 1 to 10, where 1 means 'totally unfamiliar' and 10 means 'very familiar', how familiar are you with the primary care doctor that saw your child today?

|              |   |   |   |   |   |   |   |   |               |
|--------------|---|---|---|---|---|---|---|---|---------------|
| 1            | 2 | 3 | 4 | 5 | 6 | 7 | 8 | 9 | 10            |
| Not familiar |   |   |   |   |   |   |   |   | Very familiar |

13. Please tell us how strongly do you agree or disagree with the following statements:

|                                                                                                           | <b>Strongly Agree</b>    | <b>Agree</b>             | <b>Neutral</b>           | <b>Disagree</b>          | <b>Strongly Disagree</b> |
|-----------------------------------------------------------------------------------------------------------|--------------------------|--------------------------|--------------------------|--------------------------|--------------------------|
| I sometimes feed my child because I feel I can calm him/her down faster.                                  | <input type="checkbox"/> |
| I feed my child the way I do because I feel that he/she can have much better health when he/she is older. | <input type="checkbox"/> |
| I feel that the foods I feed my child now will help him/her be stronger.                                  | <input type="checkbox"/> |
| I believe that the foods I feed my child can affect how he/she will learn.                                | <input type="checkbox"/> |
| I think the foods/drinks I give my child will affect their weight they will be at school entry.           | <input type="checkbox"/> |
| I think the foods/drinks I give my child will affect how tall they will be at school entry.               | <input type="checkbox"/> |
| Sometimes parents feed their child to make the parent's life easier.                                      | <input type="checkbox"/> |

**Thank you.**
